# Supplementary material
Source: PubMed Central journal article supplement (PMC9977235)
Supplement: glac128_suppl_supplementary_materials.pdf [file glac128_suppl_supplementary_materials.pdf]

## Supplementary Materials

| Content                                                                                                                                                                             | Pages |
|-------------------------------------------------------------------------------------------------------------------------------------------------------------------------------------|-------|
| <b>Supplementary Figure e-1.</b> Flow chart of the Religious Orders Study (ROS) participants included in the current study.                                                         | 4     |
| <b>Supplementary Figure e-2.</b> Flow chart of the Rush Memory and Aging Project (MAP) participants included in the current study.                                                  | 5     |
| <b>Supplementary Table e-1.</b> Association of demographic and clinical characteristics of participants with grip strength and gait function at the last visit before death.        | 6     |
| <b>Supplementary Table e-2.</b> Descriptive summary of neurodegenerative and vascular brain pathologies identified in postmortem examination of 1217 decedents.                     | 7     |
| <b>Supplementary Table e-3.</b> Linear mixed effects models examining grip strength and gait function in the years prior to death.                                                  | 8     |
| <b>Supplementary Figure e-3.</b> Correlation of estimated person-specific decline rates of grip strength and gait function adjusted for demographics.                               | 9     |
| <b>Supplementary Table e-4.</b> Association of the $\epsilon 4$ allele of <i>apolipoprotein E</i> ( <i>ApoE</i> ) with the longitudinal changes of grip strength and gait function. | 10    |
| <b>Supplementary Table e-5.</b> Association of vascular risk factors with the longitudinal changes of grip strength and gait function.                                              | 11    |
| <b>Supplementary Table e-6.</b> Association of history of stroke with the longitudinal changes of grip strength and gait function.                                                  | 12    |
| <b>Supplementary Table e-7.</b> Association of presence of dementia with the longitudinal changes of grip strength and gait function.                                               | 13    |
| <b>Supplementary Table e-8.</b> Association of postmortem amyloid- $\beta$ level with the longitudinal changes of grip strength and gait function prior to death.                   | 14    |
| <b>Supplementary Table e-9.</b> Association of postmortem tau tangles level with the longitudinal changes of grip strength and gait function prior to death.                        | 15    |
| <b>Supplementary Table e-10.</b> Association of postmortem TDP-43 stages with the longitudinal changes of grip strength and gait function prior to death.                           | 16    |

|                                                                                                                                                                                                                |              |
|----------------------------------------------------------------------------------------------------------------------------------------------------------------------------------------------------------------|--------------|
| <b>Supplementary Table e-11.</b> Association of postmortem hippocampal sclerosis with the longitudinal changes of grip strength and gait function prior to death.                                              | <b>17</b>    |
| <b>Supplementary Table e-12.</b> Association of postmortem presence of Lewy bodies with the longitudinal changes of grip strength and gait function prior to death.                                            | <b>18</b>    |
| <b>Supplementary Table e-13.</b> Association of postmortem moderate to severe nigral neuronal loss with the longitudinal changes of grip strength and gait function prior to death.                            | <b>19</b>    |
| <b>Supplementary Table e-14.</b> Association of postmortem macroinfarcts with the longitudinal changes of grip strength and gait function prior to death.                                                      | <b>20</b>    |
| <b>Supplementary Table e-15.</b> Association of postmortem microinfarcts with the longitudinal changes of grip strength and gait function prior to death.                                                      | <b>21</b>    |
| <b>Supplementary Table e-16.</b> Association of postmortem moderate to severe atherosclerosis with the longitudinal changes of grip strength and gait function prior to death.                                 | <b>22</b>    |
| <b>Supplementary Table e-17.</b> Association of postmortem moderate to severe arteriolosclerosis with the longitudinal changes of grip strength and gait function prior to death.                              | <b>23</b>    |
| <b>Supplementary Table e-18.</b> Association of postmortem moderate to severe cerebral amyloid angiopathy with the longitudinal changes of grip strength and gait function prior to death.                     | <b>24</b>    |
| <b>Supplementary Table e-19.</b> Association of postmortem neurodegenerative brain pathologies with the longitudinal changes of grip strength and gait function prior to death.                                | <b>25</b>    |
| <b>Supplementary Table e-20.</b> Association of postmortem cerebrovascular disease pathologies with the longitudinal changes of grip strength and gait function prior to death.                                | <b>26</b>    |
| <b>Supplementary Table e-21.</b> Association of postmortem neurodegenerative and cerebrovascular disease pathologies with the longitudinal changes of grip strength and gait function prior to death.          | <b>27</b>    |
| <b>Supplementary Table e-22:</b> Neurodegenerative vs. cerebrovascular pathologies and declining grip strength and gait function controlling for history of stroke, dementia, and their interaction with time. | <b>28-29</b> |

|                                                                                                                                                                                                               |              |
|---------------------------------------------------------------------------------------------------------------------------------------------------------------------------------------------------------------|--------------|
| <b>Supplementary Table e-23:</b> Neurodegenerative vs. cerebrovascular pathologies and declining grip strength and gait function in participants without history of stroke.                                   | <b>30-31</b> |
| <b>Supplementary Table e-24:</b> Neurodegenerative vs. cerebrovascular pathologies and declining grip strength and gait function in participants without dementia.                                            | <b>32-33</b> |
| <b>Supplementary Table e-25:</b> Neurodegenerative vs. cerebrovascular pathologies and declining grip strength and gait function controlling for parental cohort (MAP vs. ROS) and its interaction with time. | <b>34-35</b> |
| <b>Supplementary Figure e-4.</b> Using functional mixed effects (FME) models to examine non-linear trajectories of grip strength and gait function changes over time.                                         | <b>36</b>    |
| <b>Supplementary Table e-26.</b> Variance of grip strength decline rate explained by brain pathologies associated with it.                                                                                    | <b>37</b>    |
| <b>Supplementary Table e-27.</b> Variance of gait function decline rate explained by brain pathologies associated with it.                                                                                    | <b>38</b>    |
| <b>Supplementary Figure e-5.</b> The association of tangles with change in grip strength and gait function assessments.                                                                                       | <b>39</b>    |
| <b>Supplementary Figure e-6.</b> The association of macroinfarcts with change in grip strength and gait function assessments.                                                                                 | <b>40</b>    |

**Supplementary Figure e-1.** Flow chart of the Religious Orders Study (ROS) participants included in the current study.

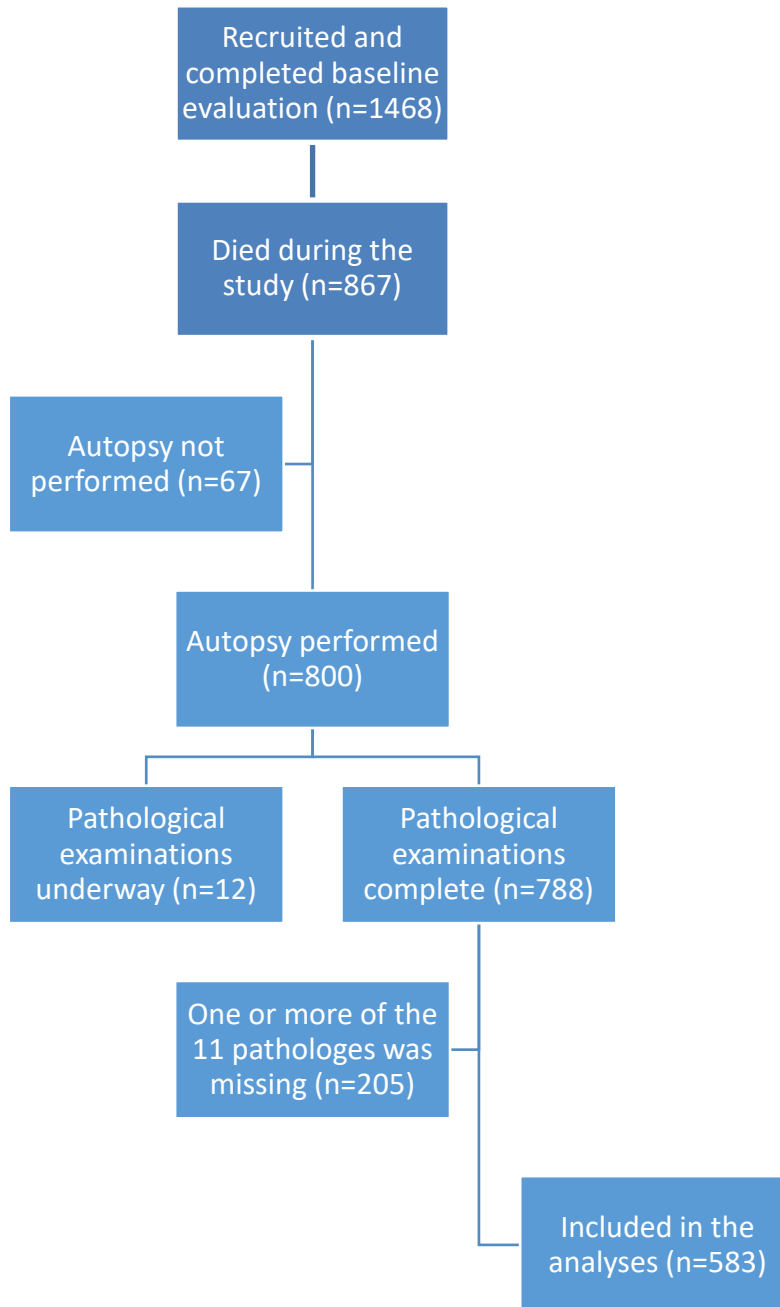

**Supplementary Figure e-2.** Flow chart of the Rush Memory and Aging Project (MAP) participants included in the current study.

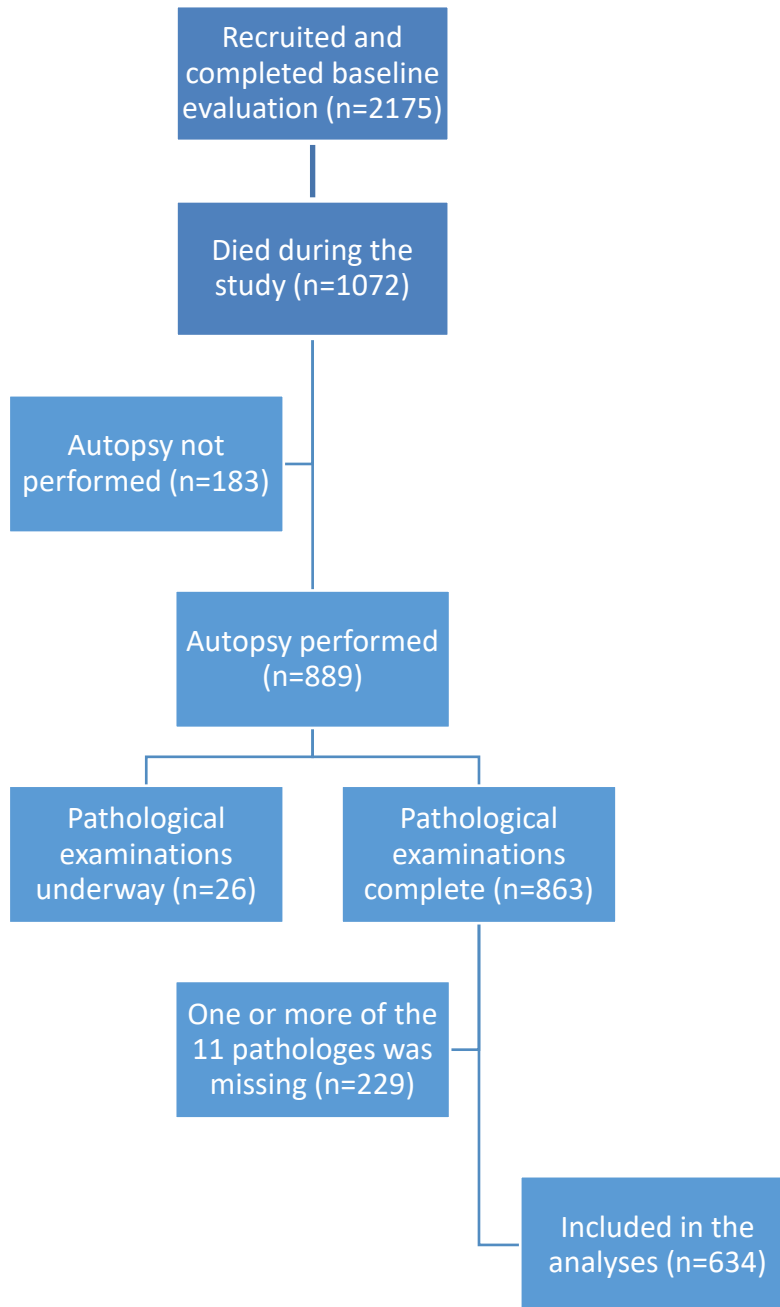

**Supplementary Table e-1.** Association of demographic and clinical characteristics of participants with grip strength and gait function at the last visit before death.

| <b>Covariates</b>                             | <b>Association with Grip strength<sup>a</sup></b> | <b>Association with Gait function<sup>a</sup></b> |
|-----------------------------------------------|---------------------------------------------------|---------------------------------------------------|
| Age at last visit (years), mean (SD)          | r = -0.34, p < 0.001                              | r = -0.28, p < 0.001                              |
| Age at death (years), mean (SD)               | r = -0.32, p < 0.001                              | r = -0.25, p < 0.001                              |
| Female, n (%)                                 | t <sub>1215</sub> = -22.8, p < 0.001              | t <sub>1215</sub> = -4.64, p < 0.001              |
| Years of education, mean (SD)                 | r = 0.08, p = 0.007                               | r = -0.07, p = 0.014                              |
| Presence of ApoE ε4, n (%)                    | t <sub>1206</sub> = -1.07, p = 0.284              | t <sub>1206</sub> = -0.22, p = 0.823              |
| Hypertension n (%)                            | t <sub>1215</sub> = -2.71, p = 0.007              | t <sub>1215</sub> = -1.75, p = 0.081              |
| Diabetes Mellitus n (%)                       | t <sub>1214</sub> = 1.55, p = 0.121               | t <sub>1215</sub> = -1.04, p = 0.299              |
| Smoking history n (%)                         | t <sub>1215</sub> = 7.78, p < 0.001               | t <sub>1215</sub> = 5.72, p < 0.001               |
| Number of vascular risk factors, median (IQR) | r = 0.11, p < 0.001                               | r = 0.08, p = 0.003                               |
| History of stroke n (%)                       | t <sub>1214</sub> = -2.10, p = 0.036              | t <sub>1214</sub> = -4.59, p < 0.001              |
| Dementia prior to death n (%)                 | t <sub>1210</sub> = -14.1, p < 0.001              | t <sub>1215</sub> = -10.3, p < 0.001              |
| Years of follow up prior to death, mean (SD)  | r = -0.03, p = 0.298                              | r = -0.11, p < 0.001                              |

Estimates are either Spearman correlation coefficients, p-values or t(degree of freedom), p-values derived from t-tests.

**Supplementary Table e-2.** Descriptive summary of neurodegenerative and vascular brain pathologies identified in postmortem examination of 1217 decedents.

| Postmortem pathologies                                | N(%) or Mean (SD)    |                                 |                           |                     |                 |
|-------------------------------------------------------|----------------------|---------------------------------|---------------------------|---------------------|-----------------|
|                                                       | No stroke<br>(n=969) | History<br>of stroke<br>(n=247) | No<br>dementia<br>(n=556) | Dementia<br>(n=661) | All<br>(n=1217) |
| <b><i>Neurodegenerative</i></b>                       |                      |                                 |                           |                     |                 |
| Alzheimer's disease, n (%)                            | 637 (66)             | 162 (66)                        | 341 (52)                  | 458 (82)            | 799 (66)        |
| Amyloid, mean (SD)                                    | 1.6 (1.1)            | 1.6 (1.1)                       | 1.3 (1.1)                 | 1.9 (1.1)           | 1.6 (1.1)       |
| Tangles, mean (SD)                                    | 1.7 (1.4)            | 1.5 (1.1)                       | 1.1 (0.9)                 | 2.3 (1.5)           | 1.7 (1.3)       |
| TDP-43 in the hippocampus or neocortex, n (%)         | 333 (34)             | 71 (29)                         | 144 (22)                  | 260 (47)            | 404 (33)        |
| Hippocampal sclerosis, n (%)                          | 104 (11)             | 17 (7)                          | 25 (4)                    | 96 (17)             | 121 (10)        |
| Lewy bodies (present in one or more sites), n (%)     | 263 (27)             | 65 (26)                         | 124 (19)                  | 204 (37)            | 328 (27)        |
| Moderate to severe nigral neuronal loss, n (%)        | 119 (12)             | 27 (11)                         | 49 (7)                    | 97 (17)             | 146 (12)        |
| <b><i>Cerebrovascular</i></b>                         |                      |                                 |                           |                     |                 |
| Macroinfarcts (1 or more), n (%)                      | 298 (31)             | 144 (58)                        | 204 (31)                  | 238 (43)            | 442 (36)        |
| Microinfarcts (1 or more), n (%)                      | 277 (29)             | 96 (39)                         | 181 (27)                  | 192 (35)            | 373 (31)        |
| Moderate to severe atherosclerosis, n (%)             | 287 (30)             | 105 (43)                        | 177 (27)                  | 215 (39)            | 392 (32)        |
| Moderate to severe arteriolosclerosis, n (%)          | 288 (30)             | 88 (36)                         | 167 (25)                  | 210 (38)            | 377 (31)        |
| Moderate to severe cerebral amyloid angiopathy, n (%) | 354 (37)             | 93 (38)                         | 197 (30)                  | 250 (45)            | 447 (37)        |
| Number of pathologies                                 | 3.1 (1.8)            | 3.5 (1.7)                       | 2.4 (1.5)                 | 4.0 (1.6)           | 3.1 (1.8)       |

**Supplementary Table e-3.** Linear mixed effects models examining grip strength and gait function in the years prior to death.

| Models' terms       | Estimate (SE), p-value  |                        |
|---------------------|-------------------------|------------------------|
|                     | Model1-Grip strength    | Model2-Gait function   |
| Intercept           | 24.268 (0.488), <0.001  | 0.571 (0.011), <0.001  |
| Age at death        | -0.732 (0.064), <0.001  | -0.014 (0.002), <0.001 |
| Sex (women vs. men) | -19.482 (0.883), <0.001 | -0.096 (0.020), <0.001 |
| Education           | 0.034 (0.114), 0.766    | -0.007 (0.003), 0.007  |
| Time                | -1.845 (0.054), <0.001  | -0.043 (0.001), <0.001 |
| Age at death×Time   | 0.019 (0.007), 0.008    | -0.000 (0.000), 0.840  |
| Sex×Time            | 1.008 (0.097), <0.001   | 0.000 (0.002), 0.997   |
| Education×Time      | 0.007 (0.012), 0.560    | -0.001 (0.000), 0.040  |

In 2 mixed effects models, we examined the levels and rates of changes in 2 motor variables: grip strength (model1) and gait function (model2).



**Supplementary Figure e-3.** Correlation of estimated person-specific decline rates of grip strength and gait function adjusted for demographics.

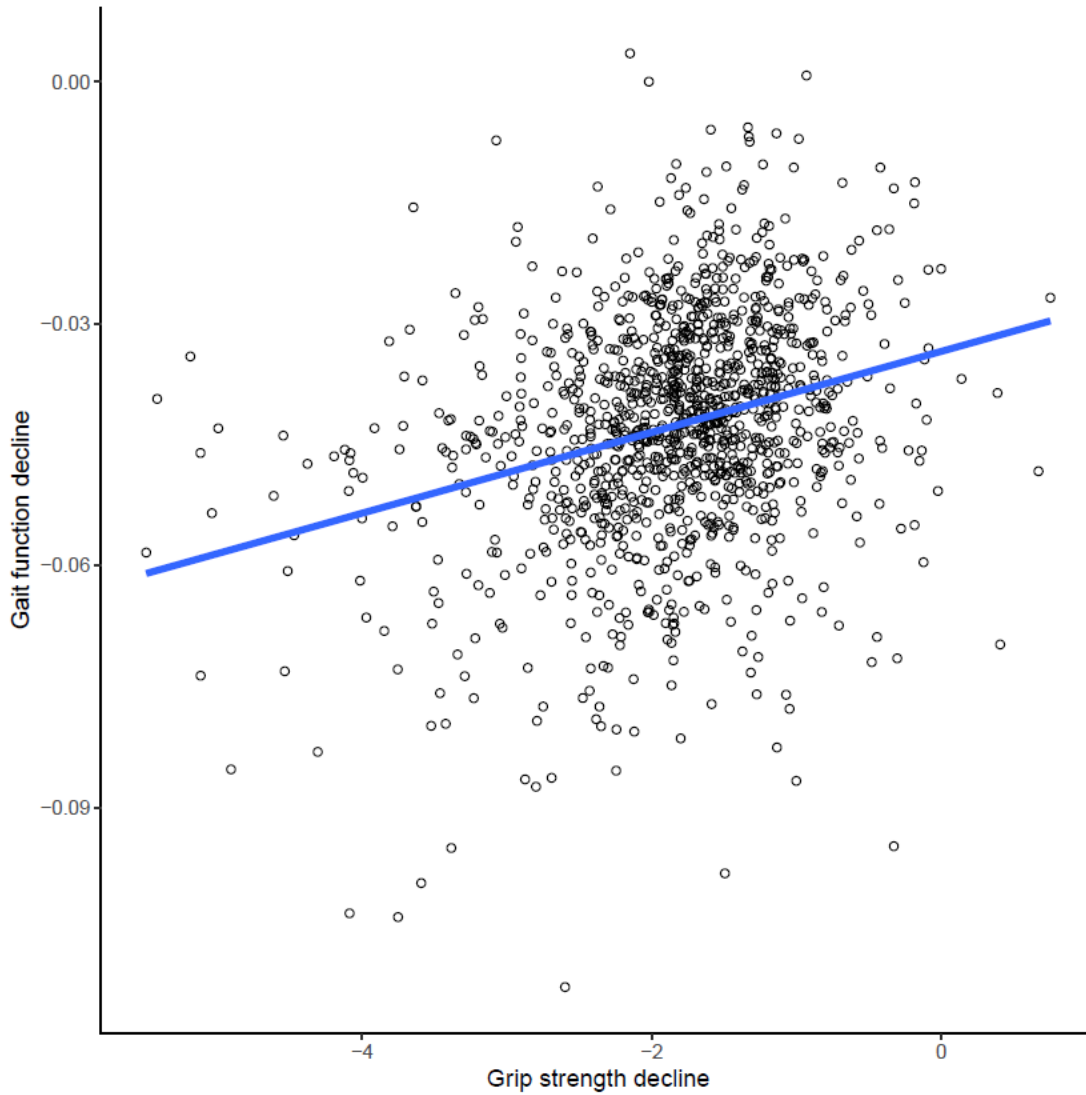

Scatterplot showing the relationship of the annual rates of grip strength decline (X axis) and gait function decline (Y axis) with a corresponding regression line. The person-specific annual rates of grip strength and gait function decline are estimated from 2 separate linear mixed effects models with grip strength and gait function as the outcomes and age at death, sex, education, time (the rate of change of either grip strength or gait function), and the interaction of the demographics with time as the model's terms.

**Supplementary Table e-4.** Association of the  $\epsilon 4$  allele of *apolipoprotein E* (*ApoE*) with the longitudinal changes of grip strength and gait function.

| Models' terms                  | Estimate (SE), p-value  |                        |
|--------------------------------|-------------------------|------------------------|
|                                | Model1-Grip strength    | Model2-Gait function   |
| Intercept                      | 24.759 (0.545), <0.001  | 0.578 (0.013), <0.001  |
| Age at death                   | -0.744 (0.064), <0.001  | -0.014 (0.002), <0.001 |
| Sex (women vs. men)            | -19.433 (0.886), <0.001 | -0.097 (0.021), <0.001 |
| Education                      | 0.052 (0.115), 0.649    | -0.007 (0.003), 0.015  |
| Time                           | -1.738 (0.060), <0.001  | -0.042 (0.001), <0.001 |
| Age at death×Time              | 0.017 (0.007), 0.019    | -0.000 (0.000), 0.781  |
| Sex×Time                       | 1.040 (0.096), <0.001   | 0.000 (0.002), 0.979   |
| Education×Time                 | 0.012 (0.012), 0.328    | -0.001 (0.000), 0.047  |
| <i>ApoE</i> $\epsilon 4$       | -1.543 (0.936), 0.099   | -0.026 (0.022), 0.237  |
| <i>ApoE</i> $\epsilon 4$ ×Time | -0.343 (0.100), <0.001  | -0.001 (0.002), 0.676  |

In 2 mixed effects models, we examined the levels and rates of changes in 2 motor variables: grip strength (model1) and gait function (model2).

**Supplementary Table e-5.** Association of vascular risk factors with the longitudinal changes of grip strength and gait function.

| Models' terms                         | Estimate (SE), p-value  |                        |
|---------------------------------------|-------------------------|------------------------|
|                                       | Model1-Grip strength    | Model2-Gait function   |
| Intercept                             | 24.026 (0.698), <0.001  | 0.570 (0.011), <0.001  |
| Age at death                          | -0.729 (0.065), <0.001  | -0.014 (0.002), <0.001 |
| Sex (women vs. men)                   | -19.455 (0.892), <0.001 | -0.097 (0.021), <0.001 |
| Education                             | 0.040 (0.116), 0.727    | -0.007 (0.003), 0.010  |
| Time                                  | -1.871 (0.076), <0.001  | -0.043 (0.002), <0.001 |
| Age at death×Time                     | 0.020 (0.007), 0.008    | -0.000 (0.000), 0.903  |
| Sex×Time                              | 1.007 (0.098), <0.001   | 0.000 (0.002), 0.954   |
| Education×Time                        | 0.007 (0.012), 0.554    | -0.001 (0.000), 0.050  |
| Number of vascular risk factors       | 0.236 (0.486), 0.625    | 0.001 (0.011), 0.934   |
| Number of vascular risk factors ×Time | 0.026 (0.052), 0.619    | 0.001 (0.001), 0.477   |

In 2 mixed effects models, we examined the levels and rates of changes in 2 motor variables: grip strength (model1) and gait function (model2).

**Supplementary Table e-6.** Association of history of stroke with the longitudinal changes of grip strength and gait function.

| Models' terms           | Estimate (SE), p-value  |                        |
|-------------------------|-------------------------|------------------------|
|                         | Model1-Grip strength    | Model2-Gait function   |
| Intercept               | 24.452 (0.533), <0.001  | 0.597 (0.012), <0.001  |
| Age at death            | -0.730 (0.064), <0.001  | -0.014 (0.002), <0.001 |
| Sex (women vs. men)     | -19.442 (0.885), <0.001 | -0.091 (0.020), <0.001 |
| Education               | 0.031 (0.114), 0.783    | -0.007 (0.003), 0.007  |
| Time                    | -1.864 (0.059), <0.001  | -0.041 (0.001), <0.001 |
| Age at death×Time       | 0.019 (0.007), 0.009    | -0.000 (0.000), 0.871  |
| Sex×Time                | 1.007 (0.097), <0.001   | 0.000 (0.002), 0.868   |
| Education×Time          | 0.007 (0.012), 0.561    | -0.001 (0.000), 0.030  |
| History of stroke       | -0.853 (0.996), 0.392   | -0.123 (0.023), <0.001 |
| History of stroke ×Time | 0.094 (0.109), 0.387    | -0.007 (0.002), 0.003  |

In 2 mixed effects models, we examined the levels and rates of changes in 2 motor variables: grip strength (model1) and gait function (model2).

**Supplementary Table e-7.** Association of presence of dementia with the longitudinal changes of grip strength and gait function.

| Models' terms       | Estimate (SE), p-value  |                        |
|---------------------|-------------------------|------------------------|
|                     | Model1-Grip strength    | Model2-Gait function   |
| Intercept           | 28.906 (0.582), <0.001  | 0.651 (0.014), <0.001  |
| Age at death        | -0.576 (0.061), <0.001  | -0.011 (0.002), <0.001 |
| Sex (women vs. men) | -19.010 (0.825), <0.001 | -0.089 (0.020), <0.001 |
| Education           | 0.075 (0.106), 0.481    | -0.006 (0.003), 0.021  |
| Time                | -1.411 (0.066), <0.001  | -0.037 (0.001), <0.001 |
| Age at death×Time   | 0.034 (0.007), 0.008    | 0.000 (0.000), 0.251   |
| Sex×Time            | 1.078 (0.093), <0.001   | 0.001 (0.002), 0.783   |
| Education×Time      | 0.012 (0.012), 0.302    | -0.000 (0.000), 0.084  |
| Dementia            | -9.759 (0.767), <0.001  | -0.179 (0.019), <0.001 |
| Dementia ×Time      | -0.901 (0.084), <0.001  | -0.012 (0.002), <0.001 |

In 2 mixed effects models, we examined the levels and rates of changes in 2 motor variables: grip strength (model1) and gait function (model2).

**Supplementary Table e-8.** Association of postmortem amyloid- $\beta$  level with the longitudinal changes of grip strength and gait function prior to death.

| Models' terms       | Estimate (SE), p-value  |                        |
|---------------------|-------------------------|------------------------|
|                     | Model1-Grip strength    | Model2-Gait function   |
| Intercept           | 26.838 (0.764), <0.001  | 0.588 (0.018), <0.001  |
| Age at death        | -0.702 (0.064), <0.001  | -0.014 (0.002), <0.001 |
| Sex (women vs. men) | -19.150 (0.879), <0.001 | -0.094 (0.020), <0.001 |
| Education           | 0.010 (0.113), 0.928    | -0.007 (0.003), 0.009  |
| Time                | -1.545 (0.085), <0.001  | -0.041 (0.002), <0.001 |
| Age at death×Time   | 0.023 (0.007), 0.002    | -0.000 (0.000), 0.952  |
| Sex×Time            | 1.048 (0.097), <0.001   | 0.000 (0.002), 0.914   |
| Education×Time      | 0.005 (0.012), 0.687    | -0.001 (0.000), 0.034  |
| Amyloid             | -1.541 (0.356), <0.001  | -0.10 (0.008), 0.219   |
| Amyloid×Time        | -0.176 (0.039), <0.001  | -0.001 (0.001), 0.140  |

In 2 mixed effects models, we examined the levels and rates of changes in 2 motor variables: grip strength (model1) and gait function (model2). Level of amyloid- $\beta$  was square root transformed.

**Supplementary Table e-9.** Association of postmortem tau tangles level with the longitudinal changes of grip strength and gait function prior to death.

| Models' terms       | Estimate (SE), p-value  |                        |
|---------------------|-------------------------|------------------------|
|                     | Model1-Grip strength    | Model2-Gait function   |
| Intercept           | 27.556 (0.728), <0.001  | 0.606 (0.017), <0.001  |
| Age at death        | -0.689 (0.064), <0.001  | -0.014 (0.002), <0.001 |
| Sex (women vs. men) | -18.743 (0.877), <0.001 | -0.089 (0.021), <0.001 |
| Education           | 0.011 (0.112), 0.923    | -0.007 (0.003), 0.008  |
| Time                | -1.494 (0.080), <0.001  | -0.039 (0.002), <0.001 |
| Age at death×Time   | 0.024 (0.007), 0.001    | 0.000 (0.000), 0.878   |
| Sex×Time            | 1.092 (0.096), <0.001   | -0.001 (0.002), 0.700  |
| Education×Time      | 0.005 (0.012), 0.680    | -0.001 (0.000), 0.031  |
| Tangles             | -1.849 (0.308), <0.001  | -0.021 (0.007), 0.005  |
| Tangles×Time        | -0.195 (0.033), <0.001  | -0.002 (0.001), 0.003  |

In 2 mixed effects models, we examined the levels and rates of changes in 2 motor variables: grip strength (model1) and gait function (model2). Level of tau tangles was square root transformed.

**Supplementary Table e-10.** Association of postmortem TDP-43 stages with the longitudinal changes of grip strength and gait function prior to death.

| Models' terms       | Estimate (SE), p-value  |                        |
|---------------------|-------------------------|------------------------|
|                     | Model1-Grip strength    | Model2-Gait function   |
| Intercept           | 25.554 (0.567), <0.001  | 0.577 (0.013), <0.001  |
| Age at death        | -0.670 (0.065), <0.001  | -0.014 (0.002), <0.001 |
| Sex (women vs. men) | -19.322 (0.876), <0.001 | -0.095 (0.020), <0.001 |
| Education           | 0.028 (0.113), 0.807    | -0.007 (0.003), 0.011  |
| Time                | -1.706 (0.063), <0.001  | -0.041 (0.001), <0.001 |
| Age at death×Time   | 0.026 (0.007), <0.001   | 0.000 (0.000), 0.851   |
| Sex×Time            | 1.027 (0.097), <0.001   | 0.000 (0.002), 0.918   |
| Education×Time      | 0.007 (0.012), 0.562    | -0.001 (0.000), 0.043  |
| TDP-43              | -3.776 (0.868), <0.001  | -0.018 (0.021), 0.369  |
| TDP-43×Time         | -0.402 (0.093), <0.001  | -0.004 (0.002), 0.065  |

In 2 mixed effects models, we examined the levels and rates of changes in 2 motor variables: grip strength (model1) and gait function (model2).



**Supplementary Table e-11.** Association of postmortem hippocampal sclerosis with the longitudinal changes of grip strength and gait function prior to death.

| Models' terms              | Estimate (SE), p-value  |                        |
|----------------------------|-------------------------|------------------------|
|                            | Model1-Grip strength    | Model2-Gait function   |
| Intercept                  | 24.818 (0.503), <0.001  | 0.572 (0.012), <0.001  |
| Age at death               | -0.710 (0.064), <0.001  | -0.014 (0.002), <0.001 |
| Sex (women vs. men)        | -19.379 (0.877), <0.001 | -0.096 (0.020), <0.001 |
| Education                  | 0.031 (0.113), 0.786    | -0.007 (0.003), 0.011  |
| Time                       | -1.789 (0.056), <0.001  | -0.042 (0.001), <0.001 |
| Age at death×Time          | 0.021 (0.007), 0.004    | -0.000 (0.000), 0.880  |
| Sex×Time                   | 1.023 (0.097), <0.001   | 0.000 (0.002), 0.969   |
| Education×Time             | 0.007 (0.012), 0.591    | -0.001 (0.000), 0.041  |
| Hippocampal sclerosis      | -5.317 (1.346), <0.001  | -0.018 (0.033), 577    |
| Hippocampal sclerosis×Time | -0.504 (0.138), <0.001  | -0.003 (0.003), 0.405  |

In 2 mixed effects models, we examined the levels and rates of changes in 2 motor variables: grip strength (model1) and gait function (model2).

**Supplementary Table e-12.** Association of postmortem presence of Lewy bodies with the longitudinal changes of grip strength and gait function prior to death.

| Models' terms       | Estimate (SE), p-value  |                        |
|---------------------|-------------------------|------------------------|
|                     | Model1-Grip strength    | Model2-Gait function   |
| Intercept           | 25.282 (0.535), <0.001  | 0.585 (0.013), <0.001  |
| Age at death        | -0.731 (0.064), <0.001  | -0.014 (0.002), <0.001 |
| Sex (women vs. men) | -19.654 (0.877), <0.001 | -0.099 (0.020), <0.001 |
| Education           | 0.039 (0.113), 0.731    | -0.007 (0.003), 0.012  |
| Time                | -1.743 (0.059), <0.001  | -0.042 (0.001), <0.001 |
| Age at death×Time   | 0.019 (0.007), 0.008    | -0.000 (0.000), 0.872  |
| Sex×Time            | 0.996 (0.097), <0.001   | -0.000 (0.002), 0.925  |
| Education×Time      | 0.008 (0.012), 0.498    | -0.001 (0.000), 0.047  |
| Lewy bodies         | -3.961 (0.897), <0.001  | -0.057 (0.021), 0.007  |
| Lewy bodies×Time    | -0.387 (0.097), <0.001  | -0.005 (0.002), 0.019  |

In 2 mixed effects models, we examined the levels and rates of changes in 2 motor variables: grip strength (model1) and gait function (model2).

**Supplementary Table e-13.** Association of postmortem moderate to severe nigral neuronal loss with the longitudinal changes of grip strength and gait function prior to death.

| Models' terms             | Estimate (SE), p-value  |                        |
|---------------------------|-------------------------|------------------------|
|                           | Model1-Grip strength    | Model2-Gait function   |
| Intercept                 | 24.721 (0.502), <0.001  | 0.583 (0.012), <0.001  |
| Age at death              | -0.736 (0.064), <0.001  | -0.014 (0.002), <0.001 |
| Sex (women vs. men)       | -19.682 (0.881), <0.001 | -0.101 (0.020), <0.001 |
| Education                 | 0.049 (0.113), 0.667    | -0.006 (0.003), 0.017  |
| Time                      | -1.784 (0.056), <0.001  | -0.042 (0.001), <0.001 |
| Age at death×Time         | 0.018 (0.007), 0.012    | -0.000 (0.000), 0.734  |
| Sex×Time                  | 0.987 (0.097), <0.001   | -0.000 (0.002), 0.850  |
| Education×Time            | 0.009 (0.012), 0.444    | -0.000 (0.000), 0.062  |
| Nigral neuronal loss      | -4.263 (1.229), <0.001  | -0.114 (0.029), <0.001 |
| Nigral neuronal loss×Time | -0.539 (0.131), <0.001  | -0.010 (0.003), <0.001 |

In 2 mixed effects models, we examined the levels and rates of changes in 2 motor variables: grip strength (model1) and gait function (model2).

**Supplementary Table e-14.** Association of postmortem presence of macroinfarcts with the longitudinal changes of grip strength and gait function prior to death.

| Models' terms       | Estimate (SE), p-value  |                        |
|---------------------|-------------------------|------------------------|
|                     | Model1-Grip strength    | Model2-Gait function   |
| Intercept           | 24.931 (0.570), <0.001  | 0.620 (0.013), <0.001  |
| Age at death        | -0.712 (0.065), <0.001  | -0.013 (0.002), <0.001 |
| Sex (women vs. men) | -19.563 (0.882), <0.001 | -0.102 (0.020), <0.001 |
| Education           | 0.015 (0.114), 0.896    | -0.008 (0.003), 0.002  |
| Time                | -1.782 (0.062), <0.001  | -0.042 (0.001), <0.001 |
| Age at death×Time   | 0.022 (0.007), 0.004    | 0.000 (0.000), 0.635   |
| Sex×Time            | 0.999 (0.097), <0.001   | -0.000 (0.002), 0.821  |
| Education×Time      | 0.005 (0.012), 0.661    | -0.001 (0.000), 0.016  |
| Macroinfarcts       | -1.884 (0.842), 0.025   | -0.142 (0.019), <0.001 |
| Macroinfarcts×Time  | -0.183 (0.092), 0.046   | -0.010 (0.002), <0.001 |

In 2 mixed effects models, we examined the levels and rates of changes in 2 motor variables: grip strength (model1) and gait function (model2).

**Supplementary Table e-15.** Association of postmortem presence of microinfarcts with the longitudinal changes of grip strength and gait function prior to death.

| Models' terms       | Estimate (SE), p-value  |                        |
|---------------------|-------------------------|------------------------|
|                     | Model1-Grip strength    | Model2-Gait function   |
| Intercept           | 24.693 (0.553), <0.001  | 0.594 (0.013), <0.001  |
| Age at death        | -0.721 (0.064), <0.001  | -0.013 (0.002), <0.001 |
| Sex (women vs. men) | -19.540 (0.884), <0.001 | -0.100 (0.020), <0.001 |
| Education           | 0.018 (0.114), 0.871    | -0.008 (0.003), 0.004  |
| Time                | -1.820 (0.061), <0.001  | -0.042 (0.001), <0.001 |
| Age at death×Time   | 0.020 (0.007), 0.007    | -0.000 (0.000), 0.989  |
| Sex×Time            | 1.004 (0.098), <0.001   | -0.000 (0.002), 0.940  |
| Education×Time      | 0.006 (0.012), 0.616    | -0.001 (0.000), 0.029  |
| Microinfarcts       | -1.422 (0.875), 0.104   | -0.080 (0.020), <0.001 |
| Microinfarcts×Time  | -0.078 (0.093), 0.402   | -0.004 (0.002), 0.047  |

In 2 mixed effects models, we examined the levels and rates of changes in 2 motor variables: grip strength (model1) and gait function (model2).

**Supplementary Table e-16.** Association of postmortem moderate to severe atherosclerosis with the longitudinal changes of grip strength and gait function prior to death.

| Models' terms        | Estimate (SE), p-value  |                        |
|----------------------|-------------------------|------------------------|
|                      | Model1-Grip strength    | Model2-Gait function   |
| Intercept            | 24.261 (0.560), <0.001  | 0.596 (0.013), <0.001  |
| Age at death         | -0.732 (0.064), <0.001  | -0.013 (0.002), <0.001 |
| Sex (women vs. men)  | -19.475 (0.884), <0.001 | -0.096 (0.020), <0.001 |
| Education            | 0.035 (0.114), 0.761    | -0.007 (0.003), 0.009  |
| Time                 | -1.818 (0.060), <0.001  | -0.040 (0.001), <0.001 |
| Age at death×Time    | 0.020 (0.007), 0.006    | 0.000 (0.000), 0.865   |
| Sex×Time             | 1.009 (0.097), <0.001   | -0.000 (0.002), 0.979  |
| Education×Time       | 0.007 (0.012), 0.541    | -0.001 (0.000), 0.042  |
| Atherosclerosis      | -0.021 (0.863), 0.981   | -0.079 (0.020), <0.001 |
| Atherosclerosis×Time | -0.100 (0.097), 0.304   | -0.008 (0.002), <0.001 |

In 2 mixed effects models, we examined the levels and rates of changes in 2 motor variables: grip strength (model1) and gait function (model2).

**Supplementary Table e-17.** Association of postmortem moderate to severe arteriolosclerosis with the longitudinal changes of grip strength and gait function prior to death.

| Models' terms            | Estimate (SE), p-value  |                        |
|--------------------------|-------------------------|------------------------|
|                          | Model1-Grip strength    | Model2-Gait function   |
| Intercept                | 24.628 (0.565), <0.001  | 0.585 (0.013), <0.001  |
| Age at death             | -0.723 (0.064), <0.001  | -0.014 (0.002), <0.001 |
| Sex (women vs. men)      | -19.412 (0.885), <0.001 | -0.099 (0.020), <0.001 |
| Education                | 0.032 (0.114), 0.776    | -0.007 (0.003), 0.010  |
| Time                     | -1.774 (0.061), <0.001  | -0.041 (0.001), <0.001 |
| Age at death×Time        | 0.021 (0.007), 0.004    | 0.000 (0.000), 0.871   |
| Sex×Time                 | 1.025 (0.097), <0.001   | 0.000 (0.002), 0.811   |
| Education×Time           | 0.007 (0.012), 0.546    | -0.001 (0.000), 0.040  |
| Arteriolosclerosis       | -1.149 (0.874), 0.189   | -0.057 (0.020), 0.005  |
| Atrteriolosclerosis×Time | -0.237 (0.097), 0.014   | -0.006 (0.002), 0.001  |

In 2 mixed effects models, we examined the levels and rates of changes in 2 motor variables: grip strength (model1) and gait function (model2).

**Supplementary Table e-18.** Association of postmortem moderate to severe cerebral amyloid angiopathy with the longitudinal changes of grip strength and gait function prior to death.

| Models' terms                    | Estimate (SE), p-value  |                        |
|----------------------------------|-------------------------|------------------------|
|                                  | Model1-Grip strength    | Model2-Gait function   |
| Intercept                        | 24.379 (0.581), <0.001  | 0.531 (0.013), <0.001  |
| Age at death                     | -0.730 (0.064), <0.001  | -0.014 (0.002), <0.001 |
| Sex (women vs. men)              | -19.450 (0.884), <0.001 | -0.095 (0.020), <0.001 |
| Education                        | 0.037 (0.114), 0.745    | -0.007 (0.003), 0.011  |
| Time                             | -1.753 (0.064), <0.001  | -0.042 (0.001), <0.001 |
| Age at death×Time                | 0.021 (0.007), 0.004    | -0.000 (0.000), 0.928  |
| Sex×Time                         | 1.022 (0.097), <0.001   | 0.000 (0.002), 0.943   |
| Education×Time                   | 0.008 (0.012), 0.495    | -0.001 (0.000), 0.042  |
| Cerebral amyloid angiopathy      | -0.272 (0.835), 0.745   | -0.029 (0.019), 0.135  |
| Cerebral amyloid angiopathy×Time | -0.237 (0.090), 0.009   | -0.003 (0.002), 0.107  |

In 2 mixed effects models, we examined the levels and rates of changes in 2 motor variables: grip strength (model1) and gait function (model2).



**Supplementary Table e-19.** Association of postmortem neurodegenerative brain pathologies with the longitudinal changes of grip strength and gait function prior to death.

| Models' terms              | Estimate (SE), p-value  |                        |
|----------------------------|-------------------------|------------------------|
|                            | Model1-Grip strength    | Model2-Gait function   |
| Intercept                  | 29.349 (0.835), <0.001  | 0.617 (0.020), <0.001  |
| Age at death               | -0.648 (0.064), <0.001  | -0.014 (0.002), <0.001 |
| Sex (women vs. men)        | -18.920 (0.868), <0.001 | -0.095 (0.021), <0.001 |
| Education                  | 0.016 (0.111), 0.887    | -0.007 (0.003), 0.013  |
| Time                       | -1.276 (0.094), <0.001  | -0.038 (0.002), <0.001 |
| Age at death×Time          | 0.028 (0.007), <0.001   | 0.000 (0.000), 0.830   |
| Sex×Time                   | 1.082 (0.095), <0.001   | 0.000 (0.002), 0.841   |
| Education×Time             | 0.006 (0.012), 0.586    | -0.000 (0.000), 0.053  |
| Amyloid                    | -0.596 (0.394), 0.131   | 0.002 (0.009), 0.798   |
| Amyloid×Time               | -0.082 (0.043), 0.057   | 0.000 (0.001), 0.939   |
| Tangles                    | -1.279 (0.353), <0.001  | -0.020 (0.009), 0.017  |
| Tangles×Time               | -0.132 (0.038), <0.001  | -0.002 (0.001), 0.018  |
| TDP-43                     | -1.976 (0.922), 0.032   | -0.010 (0.022), 0.964  |
| TDP-43×Time                | -0.229 (0.099), 0.020   | -0.002 (0.002), 0.339  |
| Hippocampal Sclerosis      | -3.096 (1.403), 0.028   | -0.001 (0.034), 0.986  |
| Hippocampal sclerosis×Time | -0.245 (0.146), 0.093   | 0.000 (0.003), 0.931   |
| Lewy bodies                | -2.080 (0.983), 0.035   | -0.018 (0.023), 0.450  |
| Lewy bodies×Time           | -0.153 (0.105), 0.144   | -0.001 (0.002), 0.649  |
| Nigral neuronal loss       | -2.709 (1.324), 0.041   | -0.103 (0.032), 0.001  |
| Nigral neuronal loss×Time  | -0.402 (0.140), 0.004   | -0.009 (0.003), 0.002  |

In 2 mixed effects models, we examined the levels and rates of changes in 2 motor variables: grip strength (model1) and gait function (model2).

**Supplementary Table e-20.** Association of postmortem cerebrovascular disease pathologies with the longitudinal changes of grip strength and gait function prior to death.

| Models' terms                    | Estimate (SE), p-value  |                        |
|----------------------------------|-------------------------|------------------------|
|                                  | Model1-Grip strength    | Model2-Gait function   |
| Intercept                        | 25.395 (0.745), <0.001  | 0.661 (0.017), <0.001  |
| Age at death                     | -0.700 (0.065), <0.001  | -0.012 (0.002), <0.001 |
| Sex (women vs. men)              | -19.492 (0.886), <0.001 | -0.101 (0.020), <0.001 |
| Education                        | 0.009 (0.114), 0.937    | -0.008 (0.003), 0.001  |
| Time                             | -1.622 (0.081), <0.001  | -0.036 (0.002), <0.001 |
| Age at death×Time                | 0.025 (0.008), <0.001   | 0.000 (0.000), 0.298   |
| Sex×Time                         | 1.029 (0.098), <0.001   | 0.000 (0.002), 0.966   |
| Education×Time                   | 0.007 (0.012), 0.572    | -0.001 (0.000), 0.019  |
| Macroinfarcts                    | -1.667 (0.879), 0.058   | -0.121 (0.020), <0.001 |
| Macroinfarcts×Time               | -0.145 (0.096), 0.129   | -0.008 (0.002), <0.001 |
| Microinfarcts                    | -1.063 (0.894), 0.235   | -0.051 (0.020), 0.012  |
| Microinfarcts×Time               | -0.039 (0.096), 0.686   | -0.002 (0.002), 0.410  |
| Atherosclerosis                  | 0.639 (0.909), 0.482    | -0.047 (0.021), 0.023  |
| Atherosclerosis×Time             | -0.027 (0.101), -.793   | -0.005 (0.002), 0.011  |
| Arteriolosclerosis               | -1.026 (0.911), 0.261   | -0.023 (0.021), 0.277  |
| Arteriolosclerosis×Time          | -0.209 (0.100), 0.038   | -0.004 (0.002), 0.059  |
| Cerebral amyloid angiopathy      | -0.280 (0.834), 0.737   | -0.033 (0.019), 0.086  |
| Cerebral amyloid angiopathy×Time | -0.240 (0.090), 0.008   | -0.003 (0.002), 0.076  |

In 2 mixed effects models, we examined the levels and rates of changes in 2 motor variables: grip strength (model1) and gait function (model2).

**Supplementary Table e-21.** Association of postmortem neurodegenerative and cerebrovascular disease pathologies with the longitudinal changes of grip strength and gait function prior to death.

| Models' terms                    | Estimate (SE), p-value  |                        |
|----------------------------------|-------------------------|------------------------|
|                                  | Model1-Grip strength    | Model2-Gait function   |
| Intercept                        | 30.051 (0.951), <0.001  | 0.696 (0.022), <0.001  |
| Age at death                     | -0.624 (0.065), <0.001  | -0.012 (0.002), <0.001 |
| Sex (women vs. men)              | -18.982 (0.868), <0.001 | -0.102 (0.020), <0.001 |
| Education                        | 0.021 (0.111), 0.850    | -0.008 (0.003), 0.002  |
| Time                             | -1.156 (0.106), <0.001  | -0.032 (0.002), <0.001 |
| Age at death×Time                | 0.032 (0.007), <0.001   | 0.000 (0.000), 0.193   |
| Sex×Time                         | 1.081 (0.096), <0.001   | 0.000 (0.002), 0.913   |
| Education×Time                   | 0.005 (0.012), 0.665    | -0.001 (0.000), 0.026  |
| Amyloid                          | -0.673 (0.398), 0.092   | 0.004 (0.009), 0.645   |
| Amyloid×Time                     | -0.079 (0.043), 0.068   | 0.000 (0.001), 0.810   |
| Tangles                          | -1.421 (0.362), <0.001  | -0.019 (0.009), 0.026  |
| Tangles×Time                     | -0.121 (0.039), 0.002   | -0.002 (0.001), 0.043  |
| TDP-43                           | -2.019 (0.921), 0.029   | 0.000 (0.022), 0.986   |
| TDP-43×Time                      | -0.231 (0.099), 0.020   | -0.002 (0.002), 0.343  |
| Hippocampal Sclerosis            | -2.952 (1.402), 0.036   | 0.003 (0.034), 0.925   |
| Hippocampal sclerosis×Time       | -0.222 (0.147), 0.130   | 0.001 (0.003), 0.864   |
| Lewy bodies                      | -2.139 (0.982), 0.030   | -0.022 (0.023), 0.336  |
| Lewy bodies×Time                 | -0.166 (0.105), 0.113   | -0.001 (0.002), 0.564  |
| Nigral neuronal loss             | -2.666 (1.324), 0.044   | -0.099 (0.031), 0.001  |
| Nigral neuronal loss×Time        | -0.389 (0.140), 0.006   | -0.009 (0.003), 0.003  |
| Macroinfarcts                    | -1.683 (0.852), 0.048   | -0.124 (0.020), <0.001 |
| Macroinfarcts×Time               | -0.153 (0.093), 0.101   | -0.009 (0.002), <0.001 |
| Microinfarcts                    | -1.269 (0.867), 0.144   | -0.053 (0.020), 0.009  |
| Microinfarcts×Time               | -0.063 (0.093), 0.495   | -0.002 (0.002), 0.379  |
| Atherosclerosis                  | 0.699 (0.882), 0.428    | -0.043 (0.020), 0.034  |
| Atherosclerosis×Time             | -0.011 (0.099), 0.912   | -0.005 (0.002), 0.019  |
| Arteriolosclerosis               | -0.466 (0.890), 0.600   | -0.016 (0.021), 0.454  |
| Arteriolosclerosis×Time          | -0.140 (0.099), 0.156   | -0.003 (0.002), 0.121  |
| Cerebral amyloid angiopathy      | 1.528 (0.855), 0.074    | -0.021 (0.020), 0.295  |
| Cerebral amyloid angiopathy×Time | -0.075 (0.093), 0.419   | -0.002 (0.002), 0.290  |

In 2 mixed effects models, we examined the levels and rates of changes in 2 motor variables: grip strength (modell1) and gait function (model2).

**Supplementary Table e-22:** Neurodegenerative vs. cerebrovascular pathologies and declining grip strength and gait function controlling for history of stroke, dementia, and their interaction with time.

| Group of pathologies                                        | Neuropathology                   | Grip strength decline<br>Estimates (SE), p-values |                          |                                  | Gait function decline<br>Estimates (SE), p-values |                                      |                                      |
|-------------------------------------------------------------|----------------------------------|---------------------------------------------------|--------------------------|----------------------------------|---------------------------------------------------|--------------------------------------|--------------------------------------|
|                                                             |                                  | Model 1                                           | Model 2                  | Model 3                          | Model 4                                           | Model 5                              | Model 6                              |
| Neurodegenerative                                           | Amyloid×Time                     | -0.067 (0.042),<br>0.112                          |                          | -0.065 (0.043),<br>0.126         | 0.001 (0.001),<br>0.573                           |                                      | 0.001 (0.001),<br>0.545              |
|                                                             | Tangles×Time                     | -0.035 (0.039),<br>0.367                          |                          | -0.028 (0.040),<br>0.486         | -0.001 (0.001),<br>0.529                          |                                      | -0.001 (0.001),<br>0.582             |
|                                                             | TDP-43×Time                      | -0.132 (0.097),<br>0.176                          |                          | -0.137 (0.098),<br>0.160         | -0.000 (0.002),<br>0.647                          |                                      | -0.001 (0.002),<br>0.605             |
|                                                             | Hippocampal sclerosis×Time       | -0.096<br>(0.144), 0.504                          |                          | -0.078 (0.144),<br>0.588         | 0.002 (0.003),<br>0.460                           |                                      | 0.002 (0.003),<br>0.453              |
|                                                             | Lewy bodies×Time                 | -0.066 (0.103),<br>0.519                          |                          | -0.080 (0.103),<br>0.436         | 0.000 (0.002),<br>0.890                           |                                      | -0.000 (0.002),<br>0.946             |
|                                                             | Nigral neuronal loss×Time        | <b>-0.289 (0.137),<br/>0.035</b>                  |                          | <b>-0.286 (0.138),<br/>0.038</b> | <b>-0.008 (0.003),<br/>0.008</b>                  |                                      | <b>-0.008 (0.003),<br/>0.009</b>     |
| Cerebrovascular Disease                                     | Macroinfarcts×Time               |                                                   | -0.096 (0.093),<br>0.321 | -0.107 (0.093),<br>0.252         |                                                   | <b>-0.007 (0.002),<br/>&lt;0.001</b> | <b>-0.007 (0.002),<br/>&lt;0.001</b> |
|                                                             | Microinfarcts×Time               |                                                   | -0.013 (0.091),<br>0.882 | -0.030 (0.091),<br>0.739         |                                                   | -0.001 (0.002),<br>0.632             | -0.001 (0.002),<br>0.597             |
|                                                             | Atherosclerosis×Time             |                                                   | -0.019 (0.097),<br>0.848 | 0.022 (0.097),<br>0.819          |                                                   | <b>-0.004 (0.002),<br/>0.047</b>     | -0.004 (0.002),<br>0.062             |
|                                                             | Arteriolosclerosis×Time          |                                                   | -0.109 (0.097),<br>0.261 | -0.101 (0.097),<br>0.298         |                                                   | -0.003 (0.002),<br>0.161             | -0.003 (0.002),<br>0.214             |
|                                                             | Cerebral amyloid angiopathy×Time |                                                   | -0.119 (0.087),<br>0.172 | -0.069 (0.091),<br>0.449         |                                                   | -0.002 (0.002),<br>0.375             | -0.002 (0.002),<br>0.363             |
| <b>Model derived variance component</b>                     |                                  |                                                   |                          |                                  |                                                   |                                      |                                      |
| Variance in the person-specific motor function decline rate |                                  | <b>1.009</b>                                      | <b>1.028</b>             | <b>1.015</b>                     | <b>0.000384</b>                                   | <b>0.000369</b>                      | <b>0.000367</b>                      |

Each model shows a single mixed-effects model with the outcome of grip strength decline (Models 1-3) or gait function decline (Models 4-6). The terms for pathologies included in each model were different: either neurodegenerative (Model 1 or 4), cerebrovascular disease pathologies (Model 2 or 5), or both together (Model 3 or 6). Each model included a term for time (the rate of change of either grip strength or gait function) with cross-sectional terms for age, sex, education, history of stroke, dementia, and each of the pathologies listed in the left column as well as their interaction with time. Each cell in a column shows the Estimate, Standard

Error and p-Value for the interaction of the pathology with Time to show whether the pathology metric was associated with either grip strength or gait function decline. Bolded cells were significant. The last row indicates variance of the person specific grip strength (models 1-3) and gait function (models 4-6) decline rates derived from the corresponding models, which were used to determine the percentage of variance in a motor function decline rate explained by pathologies.

**Supplementary Table e-23:** Neurodegenerative vs. cerebrovascular pathologies and declining grip strength and gait function in participants without history of stroke.

| Group of pathologies                                        | Neuropathology                   | Grip strength decline<br>Estimates (SE), p-values |                                  |                                  | Gait function decline<br>Estimates (SE), p-values |                                  |                                  |
|-------------------------------------------------------------|----------------------------------|---------------------------------------------------|----------------------------------|----------------------------------|---------------------------------------------------|----------------------------------|----------------------------------|
|                                                             |                                  | Model 1                                           | Model 2                          | Model 3                          | Model 4                                           | Model 5                          | Model 6                          |
| Neurodegenerative                                           | Amyloid×Time                     | <b>-0.117 (0.049),<br/>0.018</b>                  |                                  | <b>-0.117 (0.050),<br/>0.019</b> | 0.000 (0.001),<br>0.869                           |                                  | 0.000 (0.001),<br>0.732          |
|                                                             | Tangles×Time                     | <b>-0.113 (0.043),<br/>0.008</b>                  |                                  | <b>-0.010 (0.044),<br/>0.024</b> | <b>-0.002 (0.001),<br/>0.042</b>                  |                                  | -0.002 (0.001),<br>0.092         |
|                                                             | TDP-43×Time                      | <b>-0.283 (0.113),<br/>0.012</b>                  |                                  | <b>-0.287 (0.113),<br/>0.011</b> | -0.004 (0.002),<br>0.059                          |                                  | -0.004 (0.002),<br>0.069         |
|                                                             | Hippocampal sclerosis×Time       | -0.297 (0.162),<br>0.066                          |                                  | -0.256 (0.163),<br>0.116         | 0.001 (0.003),<br>0.801                           |                                  | 0.001 (0.003),<br>0.669          |
|                                                             | Lewy bodies×Time                 | -0.219 (0.119),<br>0.065                          |                                  | <b>-0.240 (0.119),<br/>0.044</b> | -0.003 (0.002),<br>0.280                          |                                  | -0.003 (0.002),<br>0.242         |
|                                                             | Nigral neuronal loss×Time        | <b>-0.391 (0.158),<br/>0.014</b>                  |                                  | <b>-0.377 (0.159),<br/>0.017</b> | <b>-0.009 (0.003),<br/>0.008</b>                  |                                  | <b>-0.009 (0.003),<br/>0.004</b> |
| Cerebrovascular Disease                                     | Macroinfarcts×Time               |                                                   | -0.146 (0.114),<br>0.200         | -0.128 (0.110),<br>0.246         |                                                   | <b>-0.007 (0.002),<br/>0.003</b> | <b>-0.007 (0.002),<br/>0.003</b> |
|                                                             | Microinfarcts×Time               |                                                   | -0.079 (0.111),<br>0.480         | -0.101 (0.108),<br>0.350         |                                                   | -0.001 (0.002),<br>0.654         | -0.001 (0.002),<br>0.605         |
|                                                             | Atherosclerosis×Time             |                                                   | 0.037 (0.119),<br>0.754          | 0.047 (0.115),<br>0.686          |                                                   | <b>-0.005 (0.002),<br/>0.026</b> | <b>-0.005 (0.002),<br/>0.043</b> |
|                                                             | Arteriolosclerosis×Time          |                                                   | <b>-0.255 (0.116),<br/>0.028</b> | -0.190 (0.114),<br>0.096         |                                                   | -0.002 (0.002),<br>0.359         | -0.002 (0.002),<br>0.468         |
|                                                             | Cerebral amyloid angiopathy×Time |                                                   | <b>-0.251 (0.104),<br/>0.016</b> | -0.049 (0.107),<br>0.645         |                                                   | -0.004 (0.002),<br>0.063         | -0.002 (0.002),<br>0.271         |
| <b>Model derived variance component</b>                     |                                  |                                                   |                                  |                                  |                                                   |                                  |                                  |
| Variance in the person-specific motor function decline rate |                                  | <b>1.183</b>                                      | <b>1.318</b>                     | <b>1.188</b>                     | <b>0.000375</b>                                   | <b>0.000363</b>                  | <b>0.000355</b>                  |

Each model shows a single mixed-effects model with the outcome of grip strength decline (Models 1-3) or gait function decline (Models 4-6). The terms for pathologies included in each model were different: either neurodegenerative (Model 1 or 4), cerebrovascular disease pathologies (Model 2 or 5), or both together (Model 3 or 6). Each model included a term for time (the rate of change of either grip strength or gait function) with cross-sectional terms for age, sex, education, and each of the pathologies listed in the left column as well as their interaction with time. Each cell in a column shows the Estimate, Standard Error and p-Value for the

interaction of the pathology with Time to show whether the pathology metric was associated with either grip strength or gait function decline. Bolded cells were significant. The last row indicates variance of the person specific grip strength (models 1-3) and gait function (models 4-6) decline rates derived from the corresponding models, which were used to determine the percentage of variance in a motor function decline rate explained by pathologies.

**Supplementary Table e-24:** Neurodegenerative vs. cerebrovascular pathologies and declining grip strength and gait function in participants without dementia.

| Group of pathologies                                        | Neuropathology                   | Grip strength decline<br>Estimates (SE), p-values |                                  |                                  | Gait function decline<br>Estimates (SE), p-values |                                  |                                  |
|-------------------------------------------------------------|----------------------------------|---------------------------------------------------|----------------------------------|----------------------------------|---------------------------------------------------|----------------------------------|----------------------------------|
|                                                             |                                  | Model 1                                           | Model 2                          | Model 3                          | Model 4                                           | Model 5                          | Model 6                          |
| Neurodegenerative                                           | Amyloid×Time                     | -0.060 (0.052),<br>0.245                          |                                  | -0.059 (0.052),<br>0.258         | -0.000 (0.001),<br>0.986                          |                                  | 0.000 (0.001),<br>0.980          |
|                                                             | Tangles×Time                     | 0.023 (0.067),<br>0.733                           |                                  | 0.026 (0.068),<br>0.702          | -0.001 (0.001),<br>0.308                          |                                  | -0.001 (0.001),<br>0.430         |
|                                                             | TDP-43×Time                      | <b>-0.273 (0.130),<br/>0.035</b>                  |                                  | <b>-0.280 (0.131),<br/>0.033</b> | 0.001 (0.003),<br>0.794                           |                                  | 0.001 (0.003),<br>0.609          |
|                                                             | Hippocampal sclerosis×Time       | 0.270 (0.273),<br>0.321                           |                                  | 0.279 (0.276),<br>0.313          | 0.007 (0.005),<br>0.175                           |                                  | 0.007 (0.005),<br>0.203          |
|                                                             | Lewy bodies×Time                 | -0.177 (0.143),<br>0.216                          |                                  | -0.194 (0.144),<br>0.178         | -0.000 (0.003),<br>0.980                          |                                  | -0.000 (0.003),<br>0.945         |
|                                                             | Nigral neuronal loss×Time        | 0.088 (0.205),<br>0.667                           |                                  | 0.076 (0.207),<br>0.712          | <b>-0.010 (0.004),<br/>0.011</b>                  |                                  | <b>-0.010 (0.004),<br/>0.012</b> |
| Cerebrovascular Disease                                     | Macroinfarcts×Time               |                                                   | 0.075 (0.119),<br>0.526          | 0.081 (0.119),<br>0.498          |                                                   | <b>-0.005 (0.002),<br/>0.054</b> | <b>-0.005 (0.002),<br/>0.037</b> |
|                                                             | Microinfarcts×Time               |                                                   | <b>-0.229 (0.115),<br/>0.046</b> | <b>-0.250 (0.116),<br/>0.031</b> |                                                   | -0.003 (0.002),<br>0.172         | -0.003 (0.002),<br>0.142         |
|                                                             | Atherosclerosis×Time             |                                                   | 0.003 (0.126),<br>0.981          | 0.034 (0.128),<br>0.790          |                                                   | <b>-0.006 (0.003),<br/>0.022</b> | <b>-0.005 (0.003),<br/>0.044</b> |
|                                                             | Arteriolosclerosis×Time          |                                                   | -0.077 (0.129),<br>0.550         | -0.084 (0.130),<br>0.518         |                                                   | -0.001 (0.003),<br>0.592         | -0.001 (0.003),<br>0.665         |
|                                                             | Cerebral amyloid angiopathy×Time |                                                   | -0.119 (0.111),<br>0.284         | -0.087 (0.115),<br>0.446         |                                                   | -0.003 (0.002),<br>0.153         | -0.003 (0.002),<br>0.176         |
| <b>Model derived variance component</b>                     |                                  |                                                   |                                  |                                  |                                                   |                                  |                                  |
| Variance in the person-specific motor function decline rate |                                  | <b>0.738</b>                                      | <b>0.746</b>                     | <b>0.749</b>                     | <b>0.000246</b>                                   | <b>0.000239</b>                  | <b>0.000231</b>                  |

Each model shows a single mixed-effects model with the outcome of grip strength decline (Models 1-3) or gait function decline (Models 4-6). The terms for pathologies included in each model were different: either neurodegenerative (Model 1 or 4), cerebrovascular disease pathologies (Model 2 or 5), or both together (Model 3 or 6). Each model included a term for time (the rate of change of either grip strength or gait function) with cross-sectional terms for age, sex, education, and each of the pathologies listed in the left column as well as their interaction with time. Each cell in a column shows the Estimate, Standard Error and p-Value for the



interaction of the pathology with Time to show whether the pathology metric was associated with either grip strength or gait function decline. Bolded cells were significant. The last row indicates variance of the person specific grip strength (models 1-3) and gait function (models 4-6) decline rates derived from the corresponding models, which were used to determine the percentage of variance in a motor function decline rate explained by pathologies.

**Supplementary Table e-25:** Neurodegenerative vs. cerebrovascular pathologies and declining grip strength and gait function controlling for parental cohort (MAP vs. ROS) and its interaction with time.

| Group of pathologies                                        | Neuropathology                   | Grip strength decline<br>Estimates (SE), p-values |                                  |                                  | Gait function decline<br>Estimates (SE), p-values |                                      |                                      |
|-------------------------------------------------------------|----------------------------------|---------------------------------------------------|----------------------------------|----------------------------------|---------------------------------------------------|--------------------------------------|--------------------------------------|
|                                                             |                                  | Model 1                                           | Model 2                          | Model 3                          | Model 4                                           | Model 5                              | Model 6                              |
| Neurodegenerative                                           | Amyloid×Time                     | -0.077 (0.043),<br>0.072                          |                                  | -0.074 (0.044),<br>0.091         | -0.000 (0.001),<br>0.839                          |                                      | 0.000 (0.001),<br>0.986              |
|                                                             | Tangles×Time                     | <b>-0.132 (0.038),<br/>&lt;0.001</b>              |                                  | <b>-0.121 (0.039),<br/>0.002</b> | <b>-0.002 (0.001),<br/>0.042</b>                  |                                      | -0.001 (0.001),<br>0.089             |
|                                                             | TDP-43×Time                      | <b>-0.227 (0.099),<br/>0.022</b>                  |                                  | <b>-0.228 (0.099),<br/>0.021</b> | -0.002 (0.002),<br>0.309                          |                                      | -0.002 (0.002),<br>0.314             |
|                                                             | Hippocampal sclerosis×Time       | -0.240<br>(0.146), 0.100                          |                                  | -0.217 (0.147),<br>0.138         | 0.000 (0.003),<br>0.882                           |                                      | 0.001 (0.003),<br>0.811              |
|                                                             | Lewy bodies×Time                 | -0.152 (0.105),<br>0.146                          |                                  | -0.165 (0.105),<br>0.115         | -0.001 (0.002),<br>0.630                          |                                      | -0.001 (0.002),<br>0.549             |
|                                                             | Nigral neuronal loss×Time        | <b>-0.411 (0.140),<br/>0.003</b>                  |                                  | <b>-0.398 (0.140),<br/>0.005</b> | <b>-0.009 (0.003),<br/>0.003</b>                  |                                      | <b>-0.008 (0.003),<br/>0.004</b>     |
| Cerebrovascular Disease                                     | Macroinfarcts×Time               |                                                   | -0.144 (0.095),<br>0.132         | -0.152 (0.093),<br>0.103         |                                                   | <b>-0.008 (0.002),<br/>&lt;0.001</b> | <b>-0.009 (0.002),<br/>&lt;0.001</b> |
|                                                             | Microinfarcts×Time               |                                                   | -0.040 (0.095),<br>0.677         | -0.064 (0.093),<br>0.491         |                                                   | -0.001 (0.002),<br>0.526             | -0.001 (0.002),<br>0.497             |
|                                                             | Atherosclerosis×Time             |                                                   | -0.045 (0.102),<br>0.657         | -0.028 (0.099),<br>0.781         |                                                   | <b>-0.005 (0.002),<br/>0.011</b>     | <b>-0.005 (0.002),<br/>0.018</b>     |
|                                                             | Arteriolosclerosis×Time          |                                                   | <b>-0.201 (0.100),<br/>0.045</b> | -0.134 (0.099),<br>0.176         |                                                   | -0.004 (0.002),<br>0.068             | -0.003 (0.002),<br>0.124             |
|                                                             | Cerebral amyloid angiopathy×Time |                                                   | <b>-0.245 (0.090),<br/>0.007</b> | -0.083 (0.093),<br>0.371         |                                                   | -0.003 (0.002),<br>0.067             | -0.002 (0.002),<br>0.251             |
| <b>Model derived variance component</b>                     |                                  |                                                   |                                  |                                  |                                                   |                                      |                                      |
| Variance in the person-specific motor function decline rate |                                  | <b>1.095</b>                                      | <b>1.195</b>                     | <b>1.095</b>                     | <b>0.000395</b>                                   | <b>0.000373</b>                      | <b>0.000367</b>                      |

Each model shows a single mixed-effects model with the outcome of grip strength decline (Models 1-3) or gait function decline (Models 4-6). The terms for pathologies included in each model were different: either neurodegenerative (Model 1 or 4), cerebrovascular disease pathologies (Model 2 or 5), or both together (Model 3 or 6). Each model included a term for time (the rate of change of either grip strength or gait function) with cross-sectional terms for age, sex, education, history of stroke, dementia, and each

of the pathologies listed in the left column as well as their interaction with time. Each cell in a column shows the Estimate, Standard Error and p-Value for the interaction of the pathology with Time to show whether the pathology metric was associated with either grip strength or gait function decline. Bolded cells were significant. The last row indicates variance of the person specific grip strength (models 1-3) and gait function (models 4-6) decline rates derived from the corresponding models, which were used to determine the percentage of variance in a motor function decline rate explained by pathologies.

**Supplementary Figure e-4.** Using functional mixed effects (FME) models to examine non-linear trajectories of grip strength and gait function changes over time.

Solid black line is the nonlinear trajectory of motor function decline estimated by a FME model (with shaded gray area indicating its 95% pointwise confidence interval), and red dashed line is the trajectory of the motor function decline estimated by a linear mixed effects model; both models were controlled for age at death, sex, education.

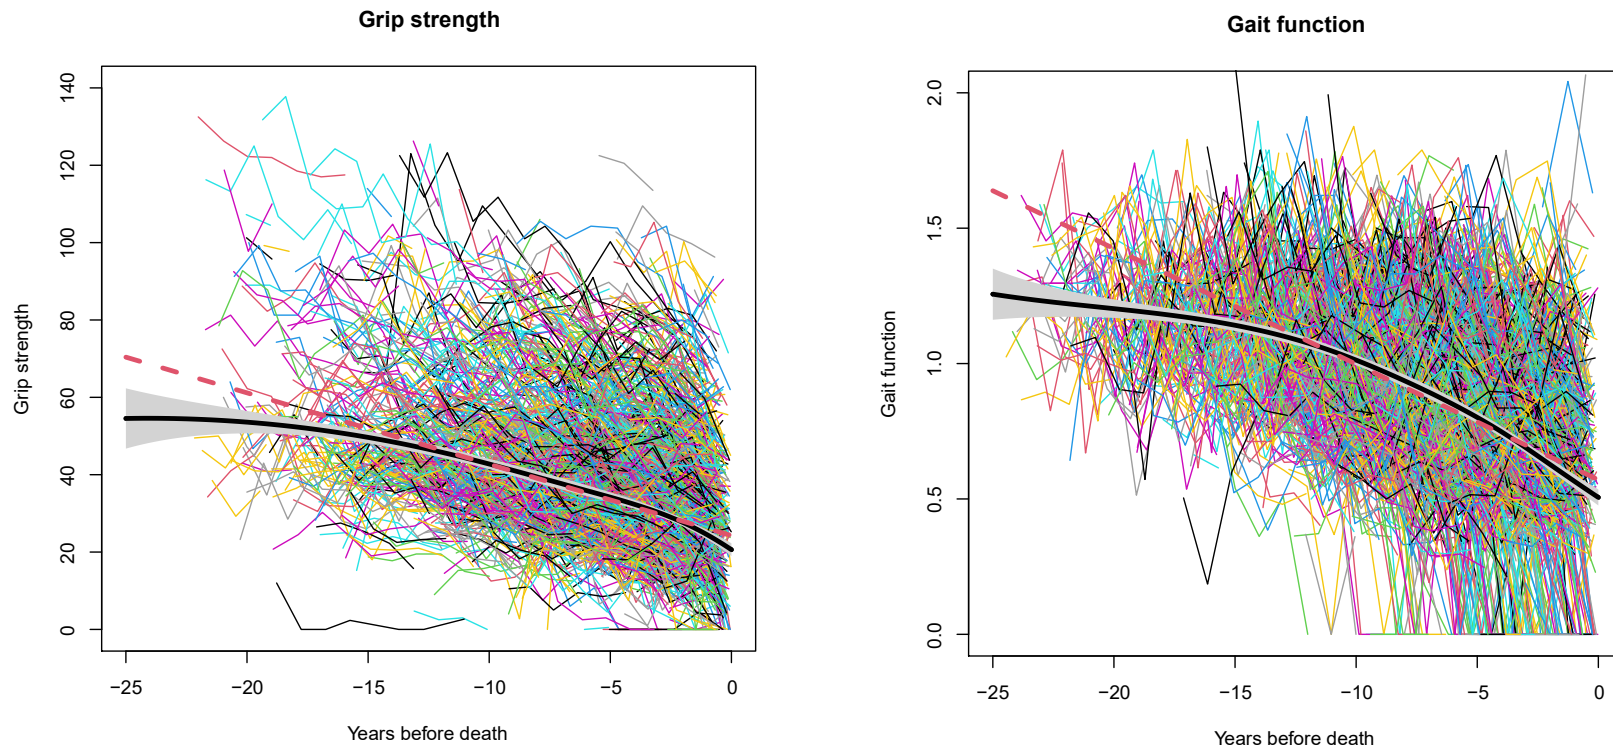

**Supplementary Table e-26.** Variance of grip strength decline rate explained by brain pathologies associated with it.

| <b>Neuropathology</b> | <b>Variance component of the decline rate in a model including the pathology of interest alone</b> | <b>Variance component of the decline rate in a model including all pathologies except the pathology of interest</b> | <b>Variance component of the decline rate in a model including All pathologies</b> | <b>Variance explained in the grip strength decline rate by the pathology of interest</b> |
|-----------------------|----------------------------------------------------------------------------------------------------|---------------------------------------------------------------------------------------------------------------------|------------------------------------------------------------------------------------|------------------------------------------------------------------------------------------|
| Tangles               | 1.142                                                                                              | 1.119                                                                                                               | 1.095                                                                              | 22% - 61%                                                                                |
| TDP-43                | 1.186                                                                                              | 1.101                                                                                                               | 1.095                                                                              | 6% - 24%                                                                                 |
| Nigral neuronal loss  | 1.193                                                                                              | 1.103                                                                                                               | 1.095                                                                              | 7% - 18%                                                                                 |

All the models were controlled for age at death, sex, education, and their interaction with time. The range of explained variance in the last column is due to the order at which the pathology of interest or the other pathologies were included in the models. Higher percentages result from when the pathology of interest is included first.

**Supplementary Table e-27.** Variance of gait function decline rate explained by brain pathologies associated with it.

| <b>Neuropathology</b> | <b>Variance component of the decline rate in a model including the pathology of interest alone</b> | <b>Variance component of the decline rate in a model including all pathologies except the pathology of interest</b> | <b>Variance component of the decline rate in a model including All pathologies</b> | <b>Variance explained in the grip strength decline rate by the pathology of interest</b> |
|-----------------------|----------------------------------------------------------------------------------------------------|---------------------------------------------------------------------------------------------------------------------|------------------------------------------------------------------------------------|------------------------------------------------------------------------------------------|
| Macroinfarcts         | 0.000397                                                                                           | 0.000399                                                                                                            | 0.000381                                                                           | 49% - 59%                                                                                |
| Atherosclerosis       | 0.000405                                                                                           | 0.000388                                                                                                            | 0.000381                                                                           | 19% - 38%                                                                                |
| Nigral neuronal loss  | 0.000408                                                                                           | 0.000390                                                                                                            | 0.000381                                                                           | 25% - 31%                                                                                |
| Tangles               | 0.000417                                                                                           | 0.000382                                                                                                            | 0.000381                                                                           | 3% - 8%                                                                                  |

All the models were controlled for age at death, sex, education, and their interaction with time. The range of explained variance in the last column is due to the order at which the pathology of interest or the other pathologies were included in the models. Higher percentages result from when the pathology of interest is included first.

**Supplementary Figure e-5.** The association of tangles with change in grip strength and gait function assessments.

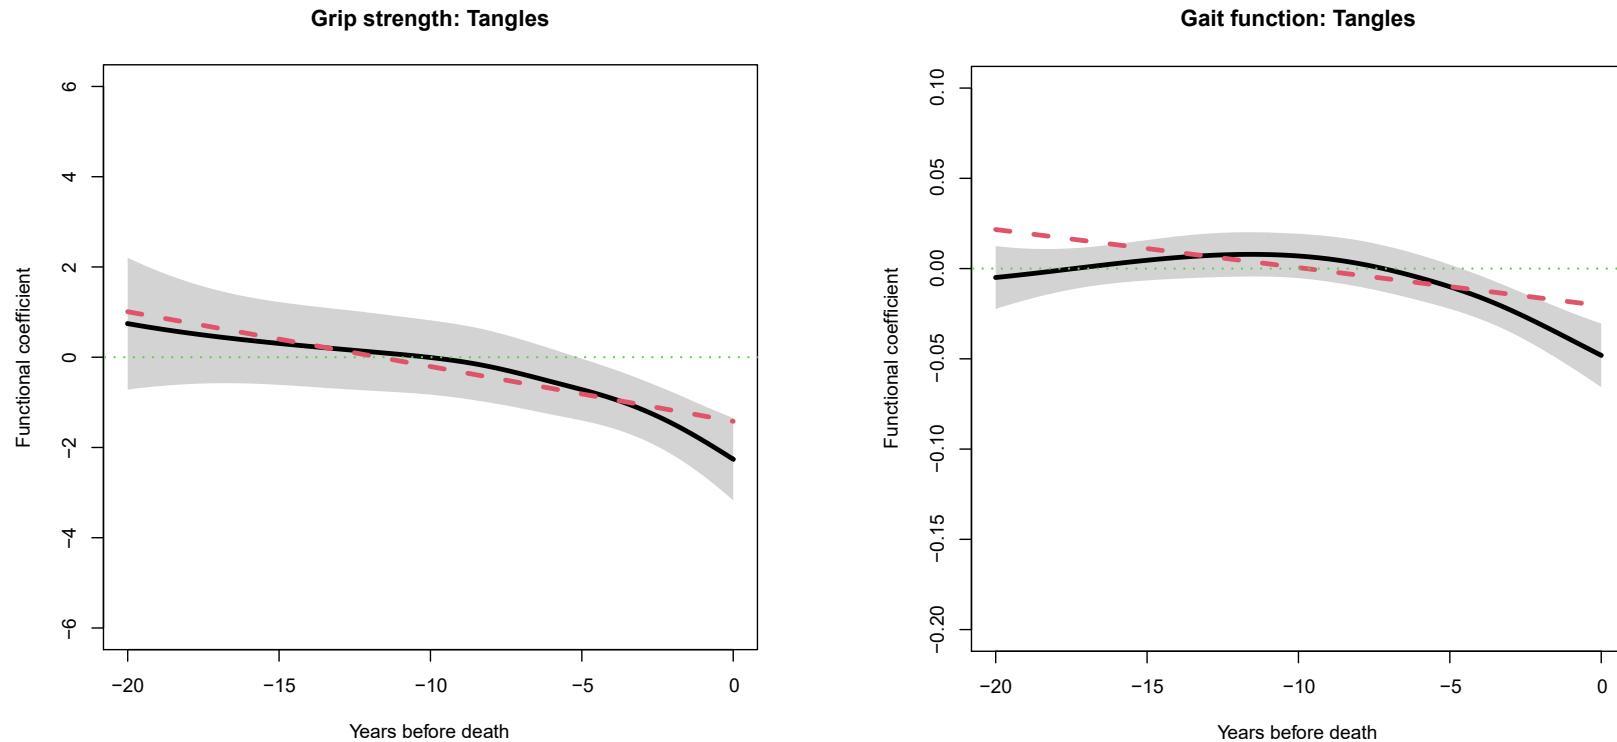

Solid black line is the nonlinear association of tangles with motor function decline estimated by a functional mixed effects model (with shaded gray area indicating its 95% pointwise confidence interval), and red dashed line is the linear association of tangles with motor function decline estimated by a linear mixed effects model; both models were controlled for age at death, sex, education. The dotted green line is the flat line of zero. If the dotted green line is not completely covered by the gray shaded area, the association between the pathology and the motor function decline is significantly non-zero. Similarly, if the dashed red line is not completely covered by the gray shaded area, the association of the pathology with the motor decline is significantly nonlinear.

**Supplementary Figure e-6.** The association of macroinfarcts with change in grip strength and gait function assessments.

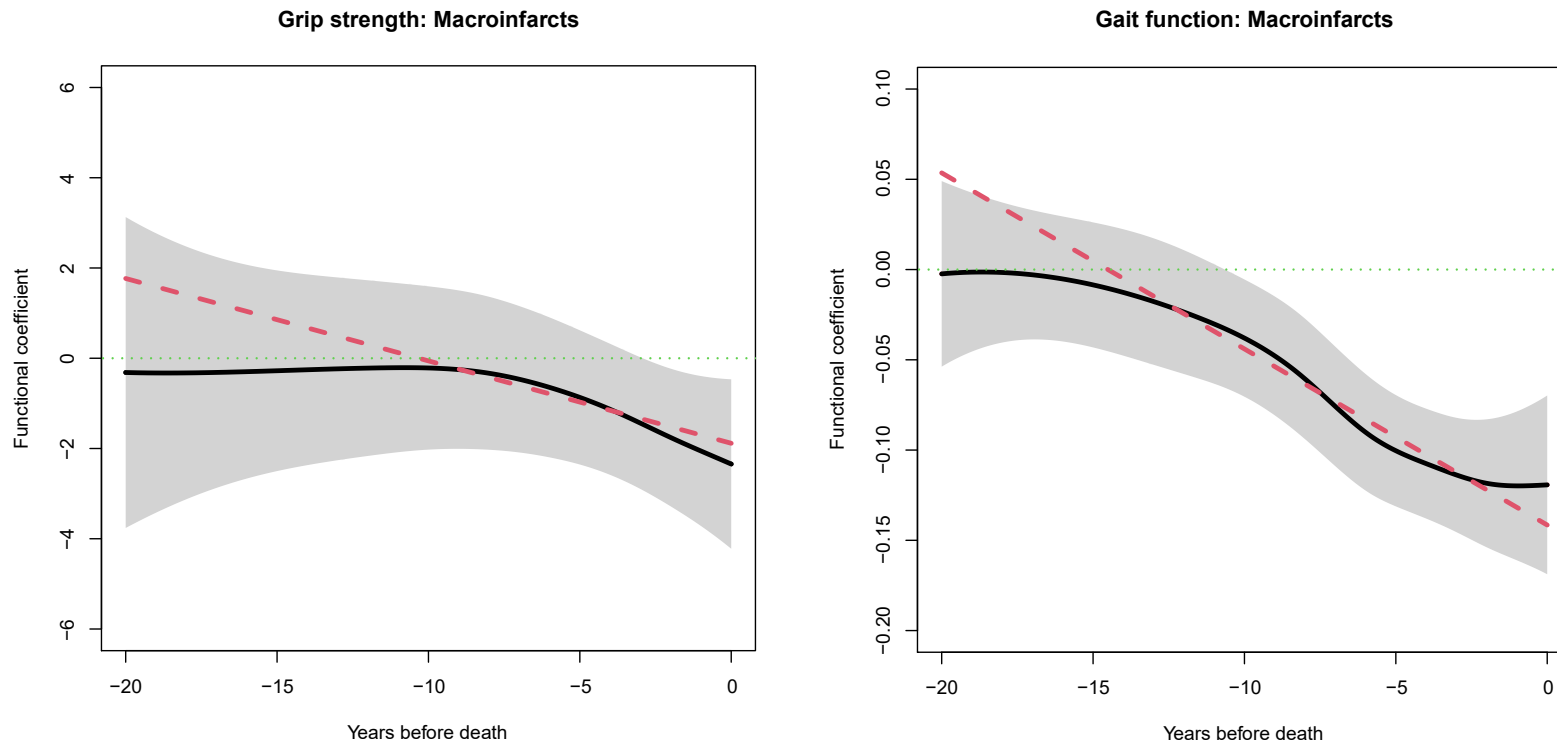

Solid black line is the nonlinear association of macroinfarcts with motor function decline estimated by a functional mixed effects model (with shaded gray area indicating its 95% pointwise confidence interval), and red dashed line is the linear association of macroinfarcts with motor function decline estimated by a linear mixed effects model; both models were controlled for age at death, sex, education. The dotted green line is the flat line of zero. If the dotted green line is not completely covered by the gray shaded area, the association between the pathology and the motor function decline is significantly non-zero. Similarly, if the dashed red line is not completely covered by the gray shaded area, the association of the pathology with the motor decline is significantly nonlinear.
